# Supplementary material for: Simulating stable carbon isotopes in the ocean component of theFAMOUS General Circulation Model with MOSES1 (XOAVI)
Source: Copernicus journal article supplement (doi:10.5194/gmd-2019-250), 2020-01-07
Supplement: Supplementary file 1 [file gmd-2019-250-supplement.zip]

# **Simulating stable carbon isotopes in the ocean component of the FAMOUS General Circulation Model with MOSES1 (XOAVI)**

Jennifer E. Dentith<sup>1</sup>, Ruza F. Ivanovic<sup>1</sup>, Lauren J. Gregoire<sup>1</sup>, Julia C. Tindall<sup>1</sup>, and Laura F. Robinson<sup>2</sup>

<sup>1</sup>School of Earth and Environment, University of Leeds, Leeds, UK, LS2 9JT

<sup>2</sup>School of Earth Sciences, University of Bristol, Bristol, UK, BS8 1RJ

*Correspondence to:* Jennifer E. Dentith (eejed@leeds.ac.uk)

**Supplementary material: Additional figures**

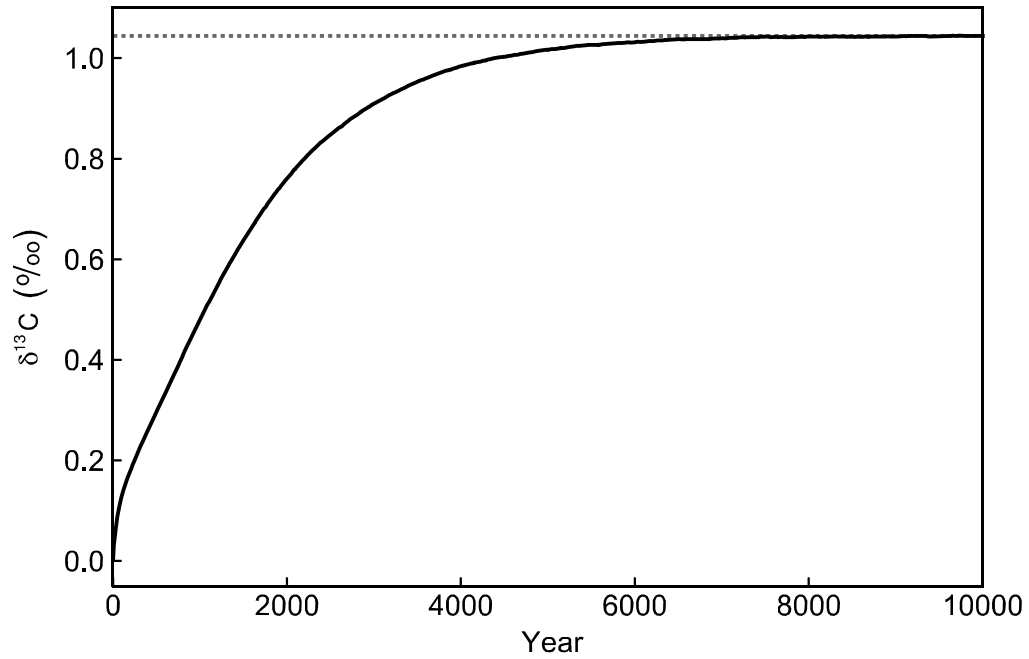

**Figure S1:** Global volume-weighted  $\delta^{13}\text{C}_{\text{DIC}}$  integral for the *std* spin-up simulation. The solid line shows the transient isotopic ratio and the dashed line shows the value at equilibrium.

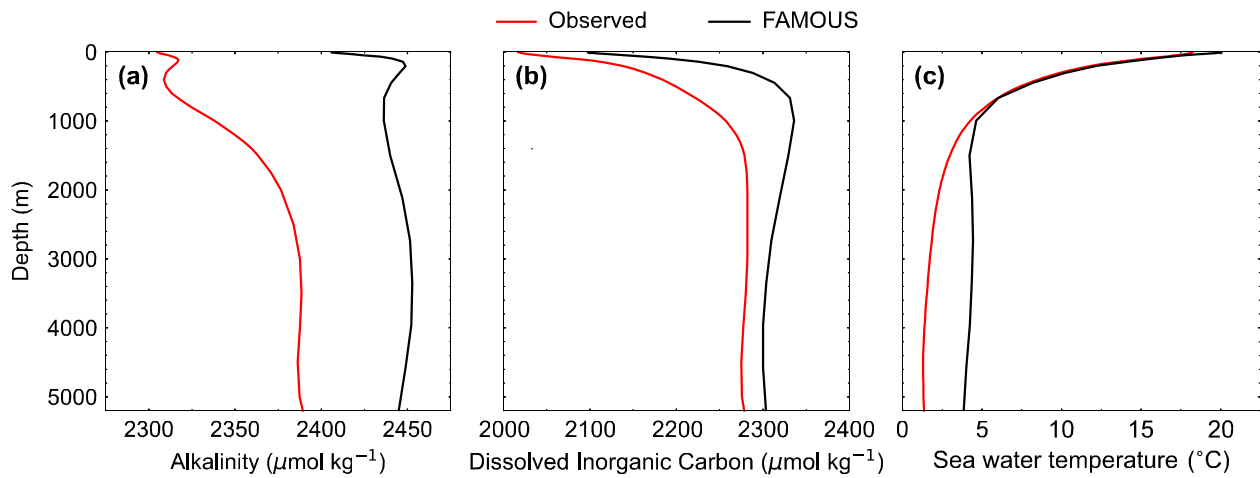

**Figure S2:** Depth profiles of globally averaged mean annual (a) alkalinity, (b) DIC, and (c) temperature. The values in the *std* simulation (black) are compared to observed values (red) from GLODAP (Key et al., 2004) and the World Ocean Atlas (Locarnini et al., 2013).

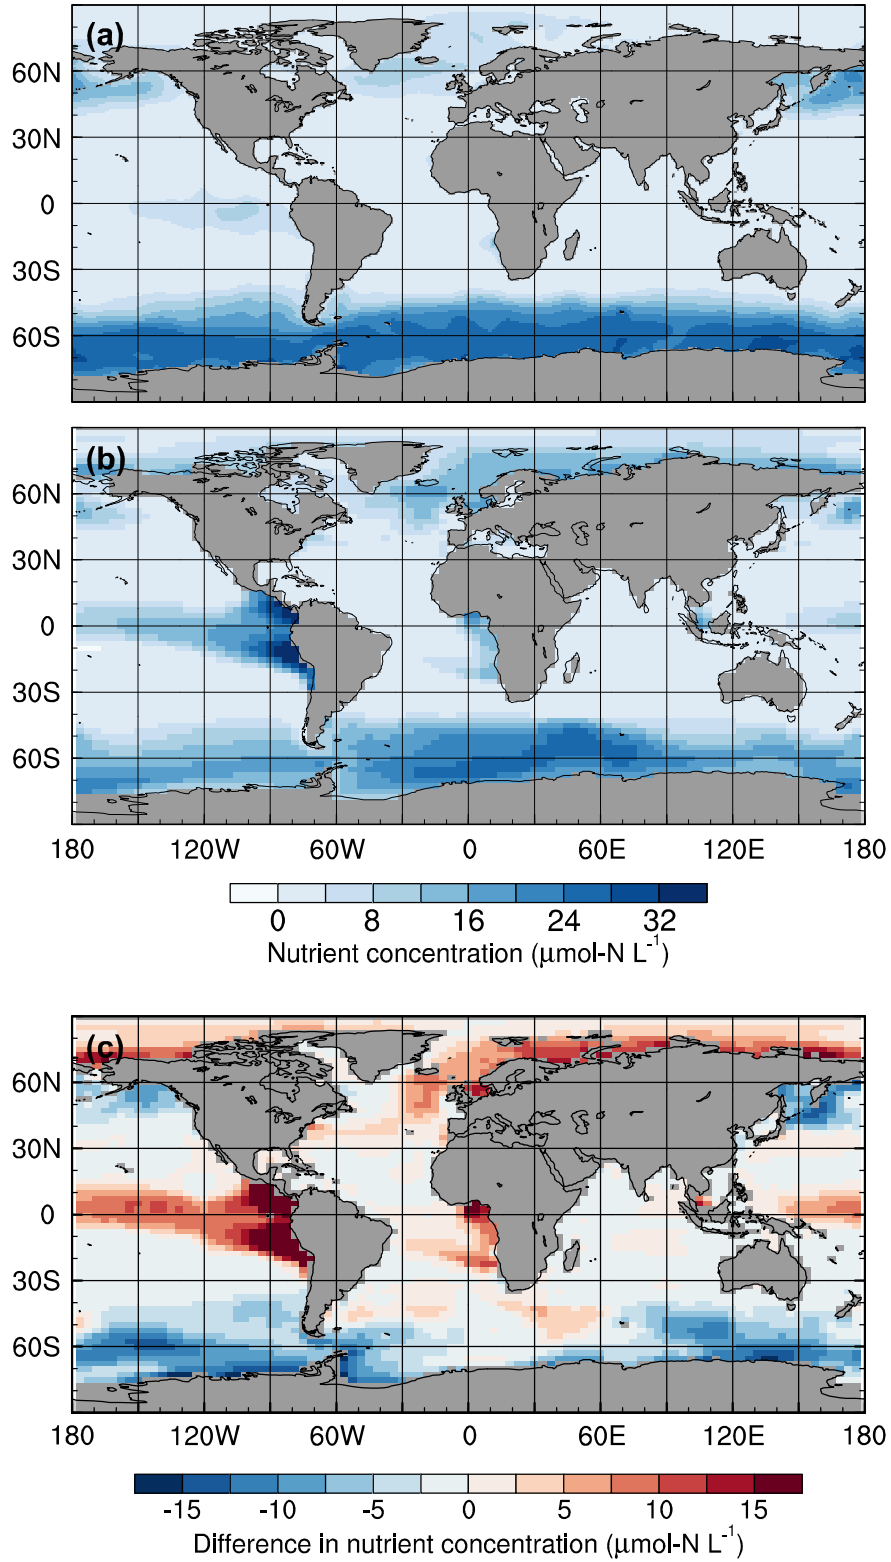

**Figure S3:** Mean annual surface nutrient concentrations: (a) World Ocean Atlas observations (Garcia et al., 2014), (b) the *std* simulation in the 1990s, and (c) simulated minus observed.

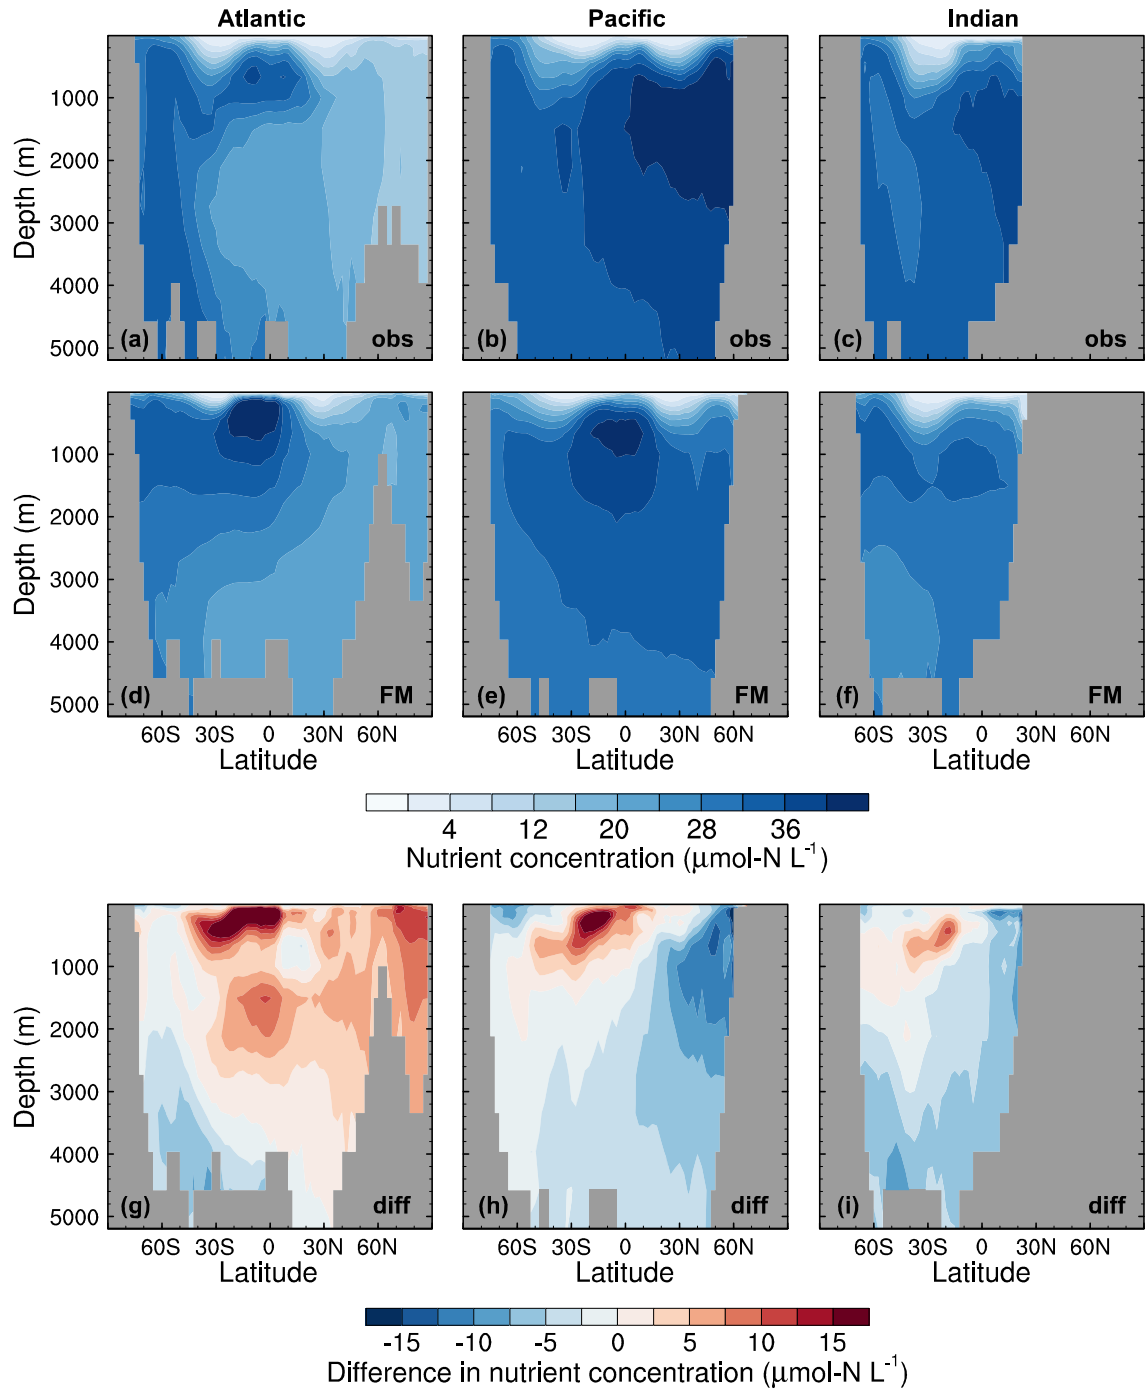

**Figure S4:** Zonal mean annual nutrient concentrations in the Atlantic Ocean (left), Pacific Ocean (centre) and Indian Ocean (right): the World Ocean Atlas observations (Garcia et al., 2014, top), the *std* simulation in the 1990s (middle), and simulated minus observed (bottom).

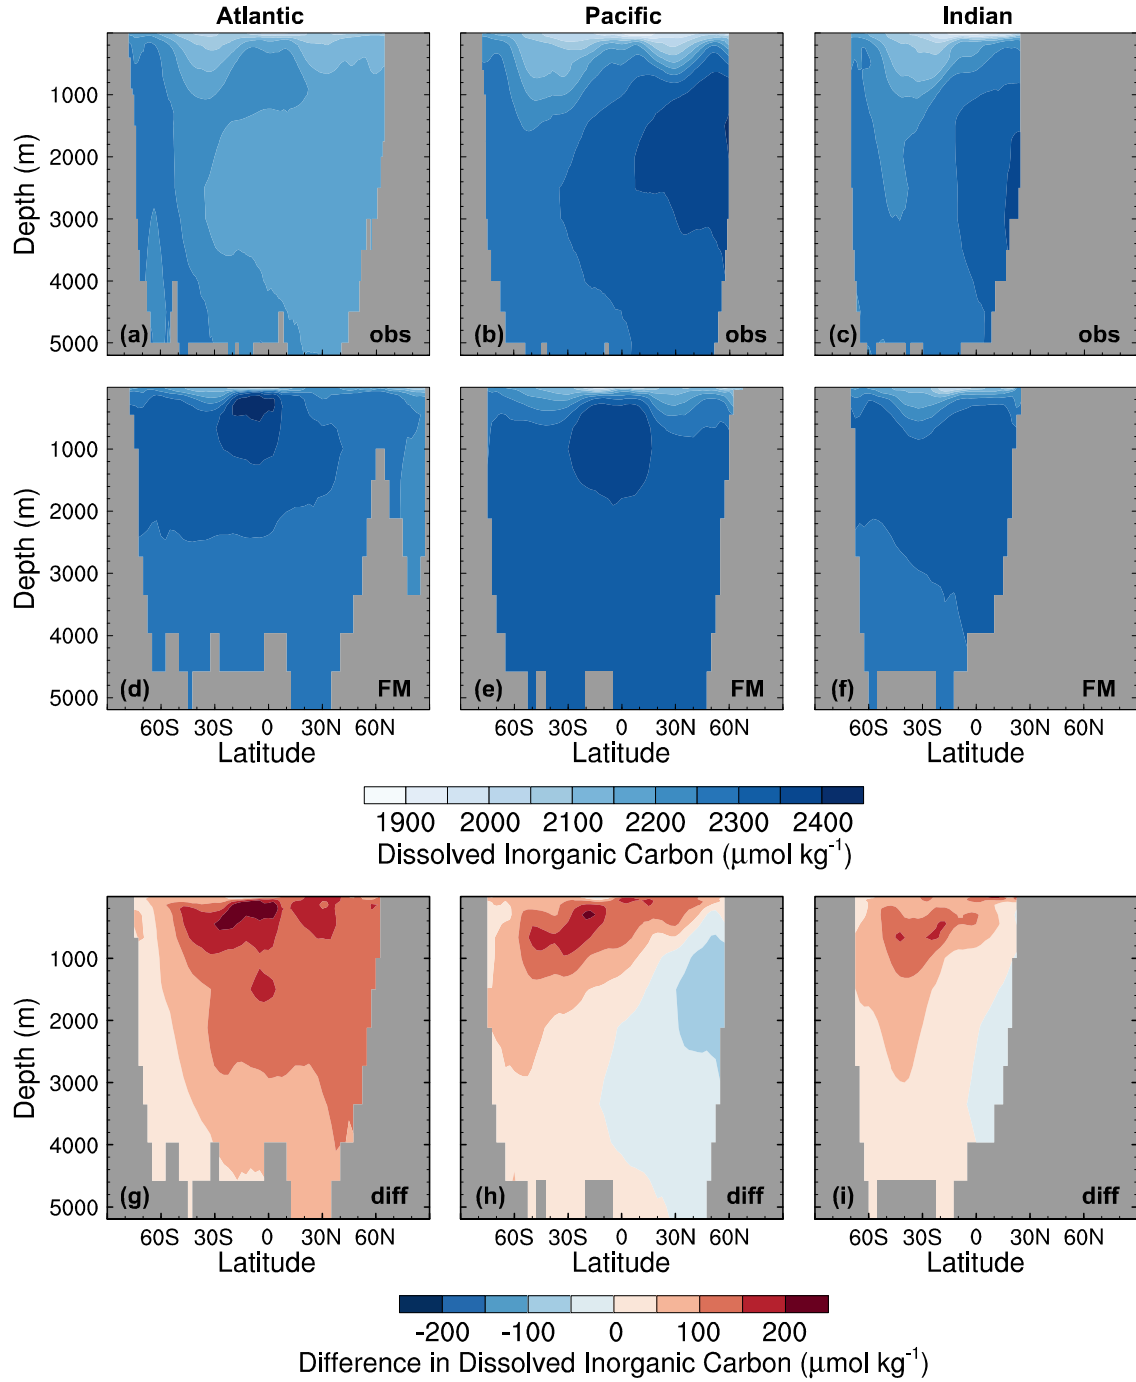

**Figure S5:** Zonal mean DIC concentrations in the Atlantic Ocean (left), Pacific Ocean (centre) and Indian Ocean (right): the GLODAP observations (Key et al., 2004, top), the *std* simulation in the 1990s (middle), and simulated minus observed (bottom).

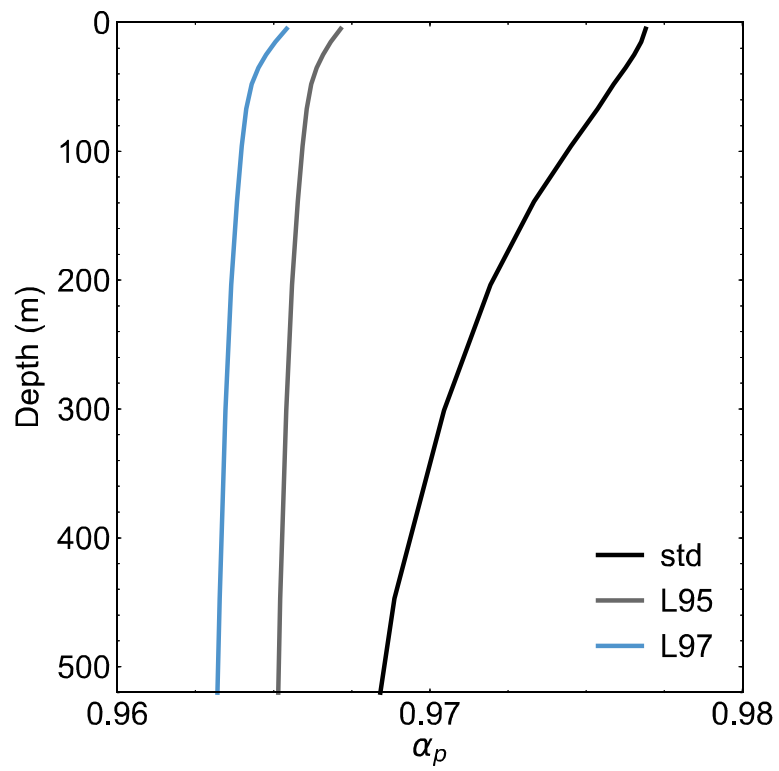

**Figure S6:** Depth profiles of globally averaged isotopic fractionation during photosynthesis ( $\alpha_p$ ) at the end of the spin-up simulations (years 9900 to 10,000): (a) the *std* simulation (black), (b) the *L95* simulation (grey), and (c) the *L97* simulation (blue).

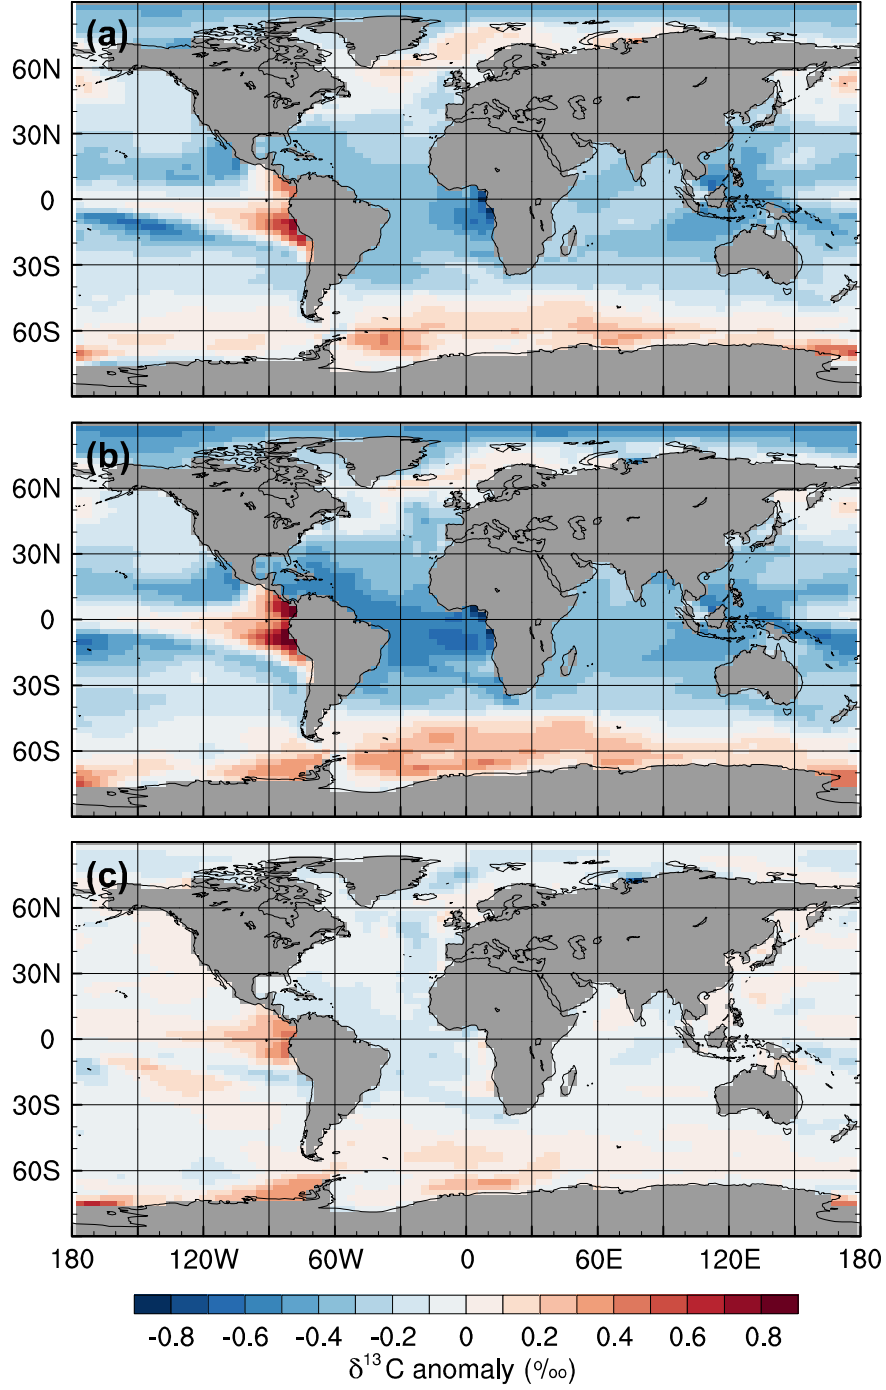

**Figure S7:** Differences between the simulated surface ocean  $\delta^{13}\text{C}_{\text{DIC}}$  values in the 1990s: (a) *std* minus *L95*, (b) *std* minus *L97*, and (c) *L95* minus *L97*.
